# Supplementary material for: Applicability of Anatomic and Physiologic Scoring Systems for the Prediction of Outcome in Polytraumatized Patients with Blunt Aortic Injuries
Source: MDPI journal article supplement (doi:10.3390/diagnostics11112156), 2021-11-21
Supplement: s1 [file s1]

**Heatmap 1 Kendall's tau: Correlation between Scores and clinical outcome parameters.**

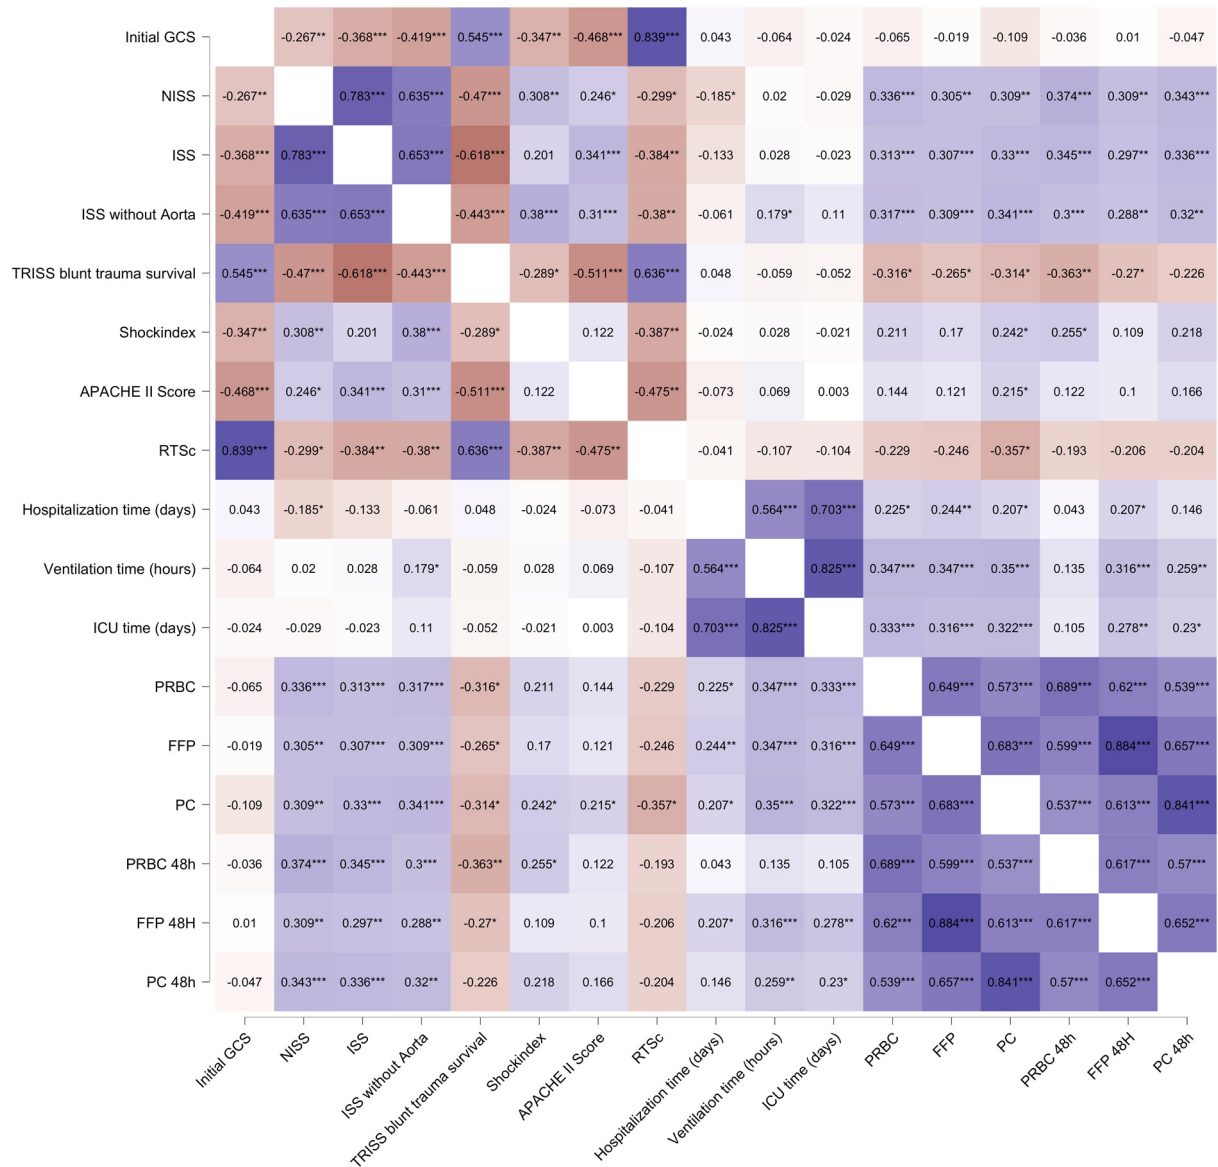

GCS= Glasgow Coma Scale; NISS: New Injury Severity Score, ISS: Injury Severity Score; TRISS: Trauma and Injury Severity Score; APACHE II: Acute Physiology And Chronic Health Evaluation II; RTSc: Revised Trauma Score coded; ICU time: Intensive Care Unit time; PRBC: Packed Red Blood Cells; FFP: Fresh Frozen Plasma; PC: platelet concentrates; \*p < .05, \*\*p < .01, \*\*\*p < .001

**Heatmap 2 Spearman's rho: Correlation between Scores and clinical outcome parameters.**

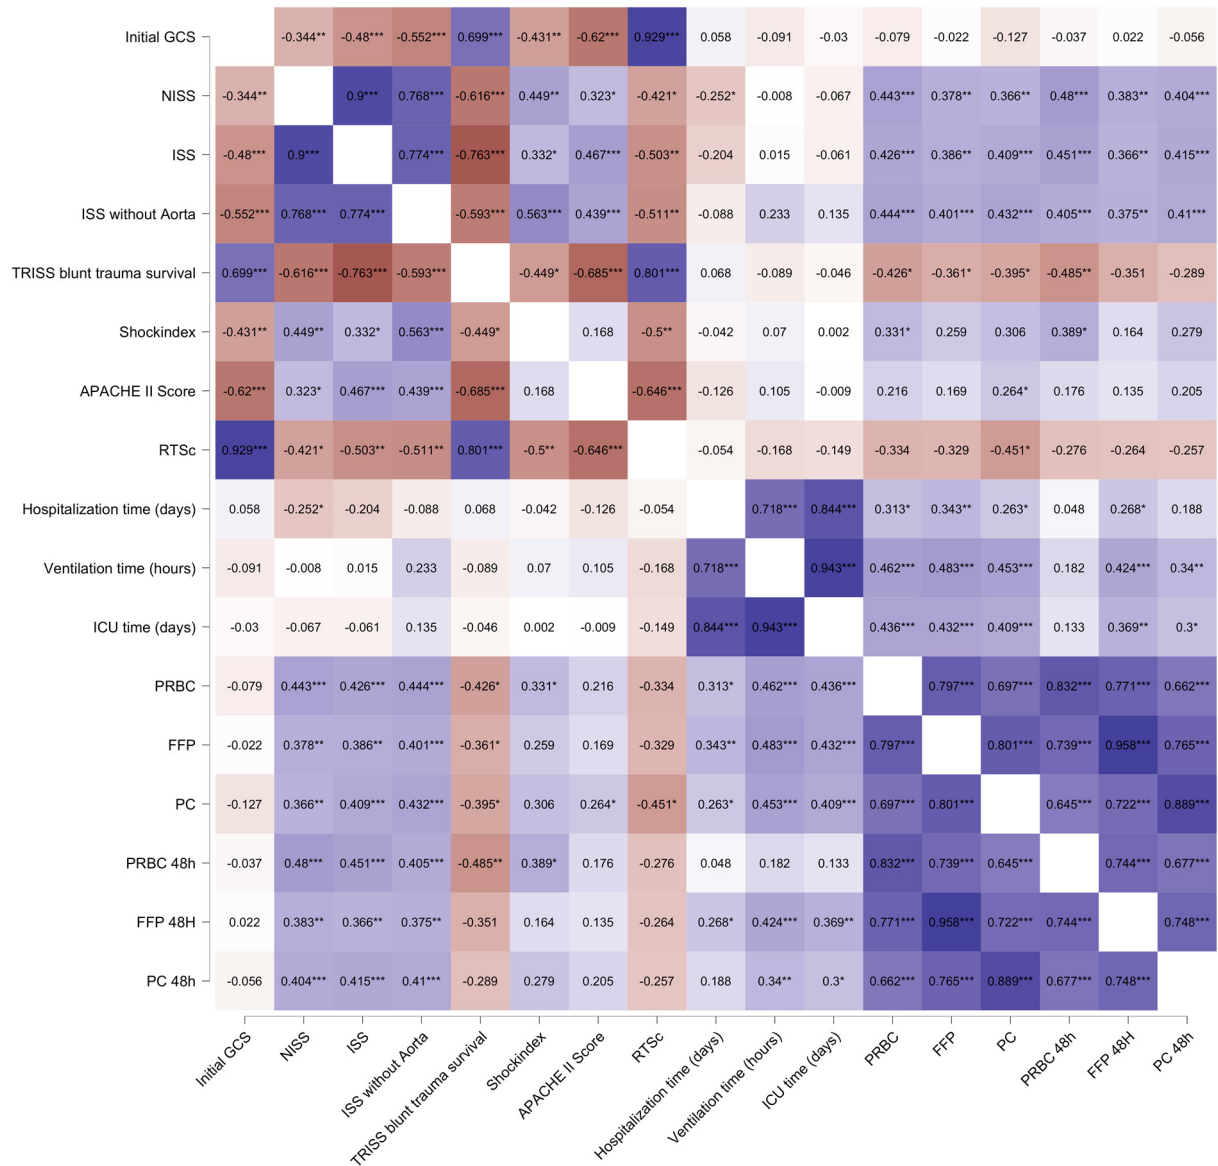

GCS= Glasgow Coma Scale; NISS: New Injury Severity Score, ISS: Injury Severity Score; TRISS: Trauma and Injury Severity Score; APACHE II: Acute Physiology And Chronic Health Evaluation II; RTSc: Revised Trauma Score coded; ICU time: Intensive Care Unit time; PRBC: Packed Red Blood Cells; FFP: Fresh Frozen Plasma; PC: platelet concentrates; \*p < .05, \*\*p < .01, \*\*\*p < .001.
